# Supplementary material for: β-Escin overcomes trastuzumab resistance in HER2-positive breast cancer by targeting cancer stem-like features
Source: PubMed Central journal article supplement (PMC9490928; doi:10.1186/s12935-022-02713-9), 2022-09-20
Supplement: 12935_2022_2713_MOESM1_ESM.pdf [file 12935_2022_2713_MOESM1_ESM.pdf]

## Supplementary information

### Title: $\beta$ -Escin overcomes trastuzumab resistance in HER2-positive breast cancer by targeting cancer stem-like features

Corresponding authors: Yoon-Jae Kim, Ji Young Kim and Jae Hong Seo

#### Supplementary Figures and Legends (Fig. S1-S3)

##### Supplementary Fig. S1

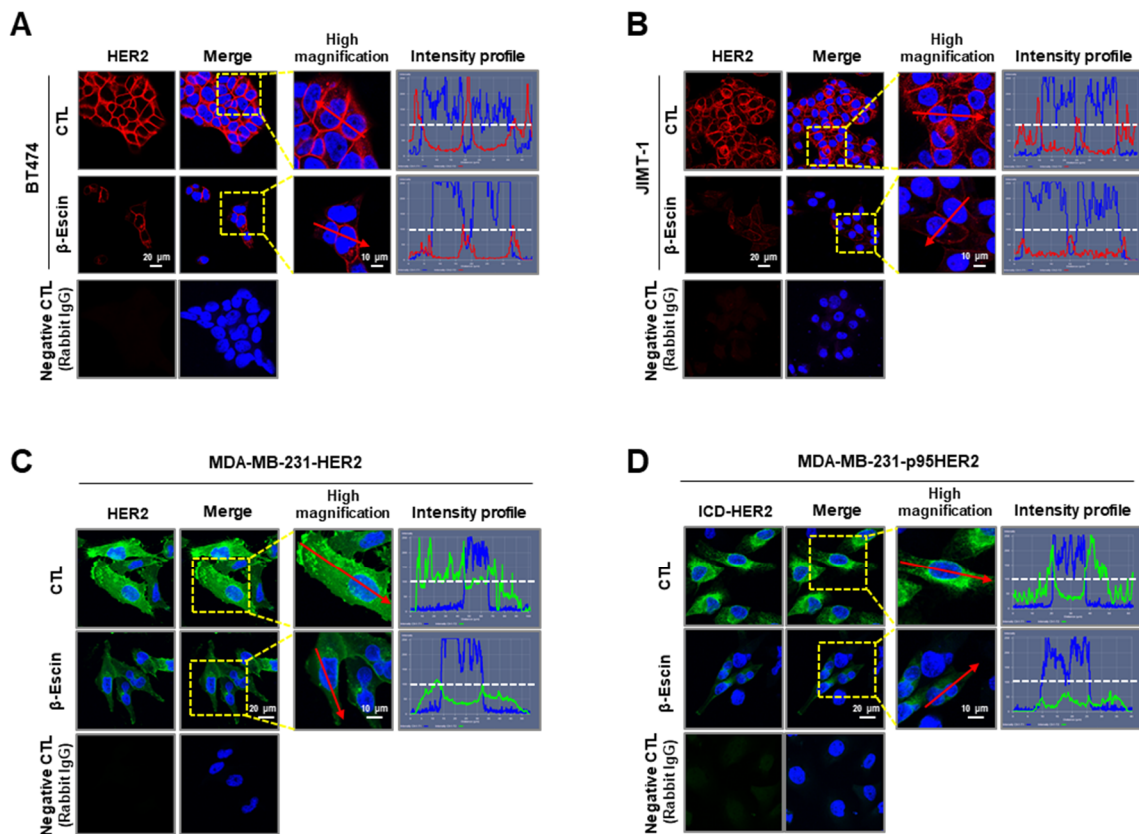

**Supplementary Fig. S1. Effect of  $\beta$ -escin on HER2 and p95HER2 expression, corresponding to Fig. 3E, F, H and I in the main text. (A, B) Immunofluorescence analysis of HER2 (red) or normal rabbit IgG (as a negative control) with DAPI (nuclei, blue) in BT474 (A) and JIMT-1 cells (B) after treatment with  $\beta$ -escin (20 and 30  $\mu$ M, respectively) for 24 h. Intensity profiles represent HER2 expression with green signal fluorescence. (C, D) Immunofluorescence analyses of HER2 (C, green) and ICD-HER2 (D, green, 4B5) or normal**

rabbit IgG (as a negative control) with DAPI (nucleus, blue) in HER2- and p95HER2-overexpressing MDA-MB-231 cells in the presence of  $\beta$ -escin (20 and 30  $\mu$ M, respectively) for 24 h. Intensity profiles were analyzed with the histogram tool in the Zen blue software and the horizontal line (white dotted line) indicates 100 intensity units (range of y-axis, 0-250 units).

**Supplementary Fig. S2**

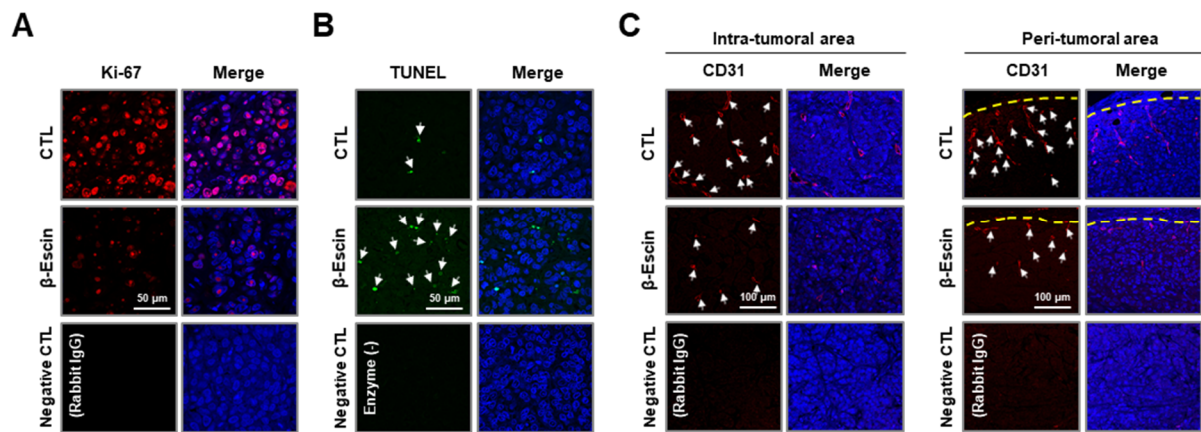

**Supplementary Fig. S2. Influence of  $\beta$ -escin on Ki-67 expression, apoptosis and tumor angiogenesis *in vivo*, corresponding to Fig. 5I-K in the main text. (A)** The effect of  $\beta$ -escin on Ki-67 expression. Sections were immunostained to assess Ki-67 (red) or normal rabbit IgG (as a negative control) with DAPI (blue). Original magnification:  $\times 500$ . **(B)**  $\beta$ -escin-induced apoptosis was determined by TUNEL assay. The white arrows indicate the TUNEL-positive apoptotic cells. Label solution without terminal transferase enzyme was used as a negative control. Original magnification:  $\times 500$ . **(C)** Tumor angiogenesis was evaluated for each group of xenograft tumors. Tissues were immunostained using an endothelial cell marker CD31 (red) or normal rabbit IgG (as a negative control) with DAPI (blue). Original magnification:  $\times 250$ .

**Supplementary Fig. S3**

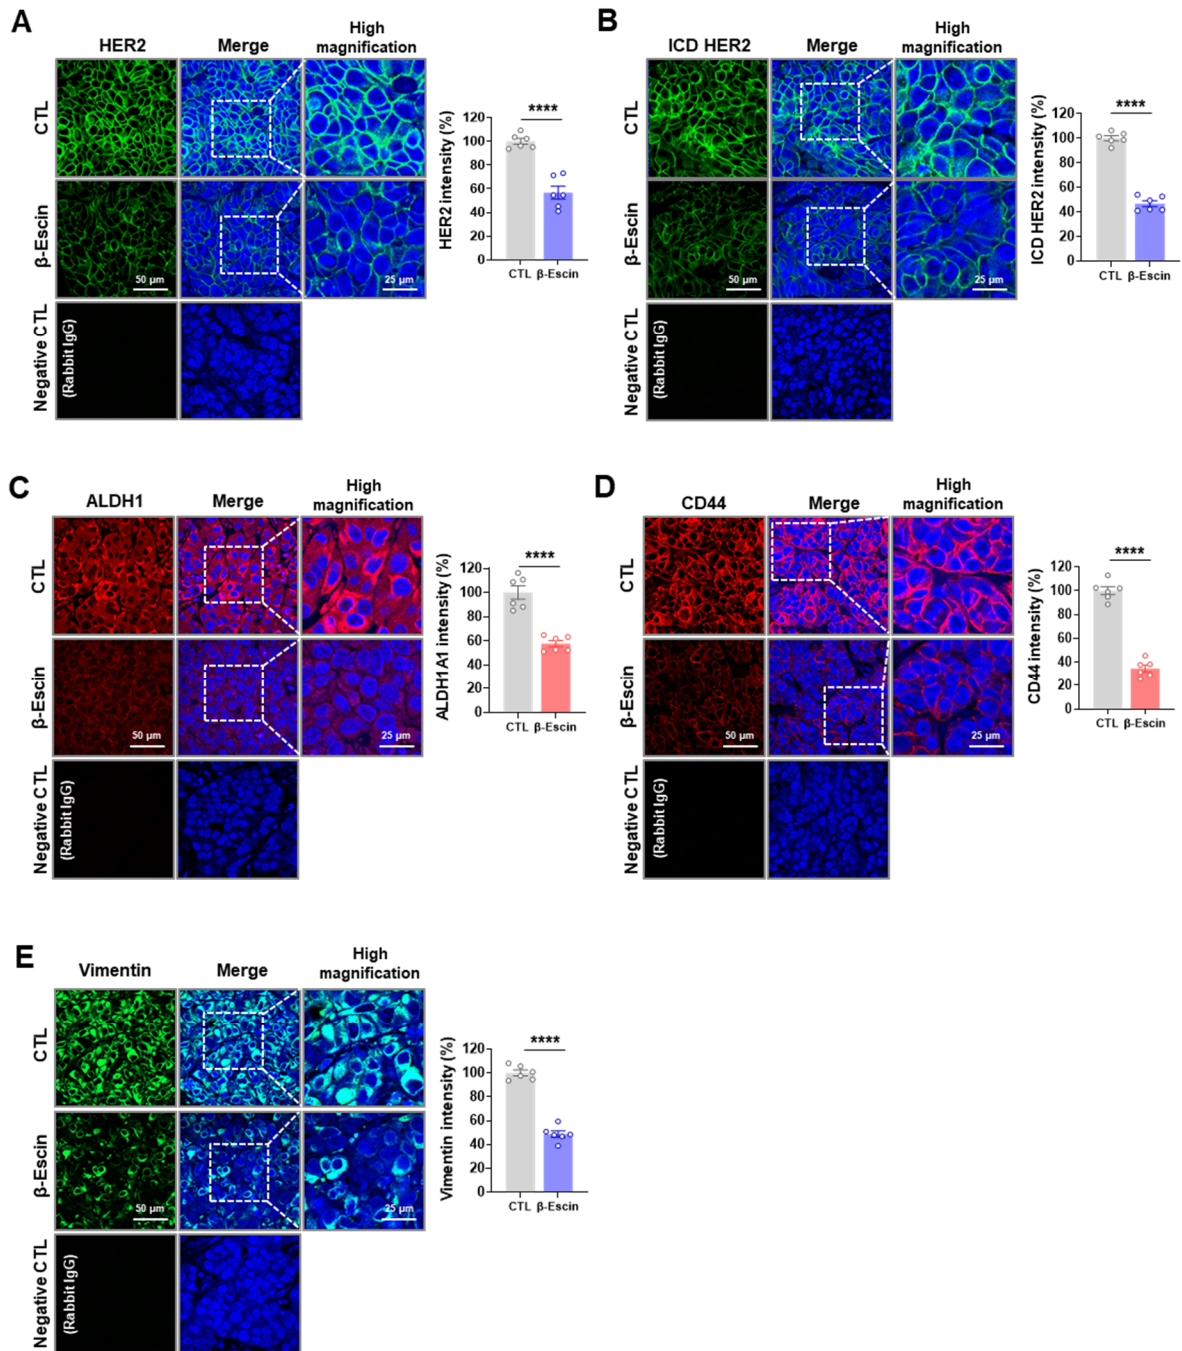

**Supplementary Fig. S3. Effect of  $\beta$ -escin on full-length HER2, ICD-HER2, ALDH1, CD44 and vimentin in JIMT-1 xenograft tumors, corresponding to Fig. 6A-E in the main text. (A, B)  $\beta$ -escin administration resulted in a marked downregulation of full-length HER2 and ICD-HER2 in JIMT-1 xenograft tumors. Tumor tissues were immunostained for full-length HER2 (polyclonal antibody 29D8, green), ICD-HER2 (monoclonal antibody 4B5, green) or**

normal rabbit IgG (as a negative control) with DAPI (blue). High magnification images were taken using confocal microscopy (original magnification:  $\times 500$ ). Quantitative graphs of signal intensities for full-length HER2 (**A**, \*\*\*\* $p < 0.0001$ ) and ICD-HER2 (**B**, \*\*\*\* $p < 0.0001$ ) are shown in the right panel, respectively. (**C**, **D**) Immunohistochemical analysis for the ALDH1 (**C**, red), CD44 (**D**, red) or normal rabbit IgG (as a negative control) in JIMT-1 xenograft tumors. Signal intensities were quantified and the graphs are shown in the right panels (\*\*\*\* $p < 0.0001$ ). (**E**) Influence of  $\beta$ -escin on vimentin expression *in vivo*. The immunofluorescence images of vimentin (green) or normal rabbit IgG (as a negative control) with DAPI (blue) are shown at high magnification ( $\times 500$ ), and the vimentin intensity was quantified (\*\*\*\* $p < 0.0001$ ). Images were taken under a confocal microscope and the fluorescence intensity was analyzed with a histogram tool within the Zen blue software. Data were analyzed using unpaired Student's t-test.
